# Supplementary material for: Improvement of pregnancy outcome by extending embryo culture in IVF-ET during clinical application
Source: Springer Nature journal article supplement (doi:10.1007/s10815-017-1065-5), 2017-11-09
Supplement: MOESM1 [file 15208574]

## Sheet: Info
Article title: Improvement of Pregnancy Outcome by Extending Embryo Culture in IVF-ET during Clinical Application
Journal name: Journal of Assisted Reproduction and Genetics
Author names: Xiaopeng Zhao ·Binbin Ma · Shaokang Mo ·Lu Ma · Fei Chang· Liyuan Zhang · Fang Xu* · Ling Wang*
* Corresponding authors: 1. Ling Wang, E-mail: szzxwangling@163.com, Reproductive Medical Center, General Hospital of Lanzhou Military Region, Lanzhou, China. 2. Fang Xu, E-mail: xufang@nxmu.edu.cn, Key Laboratory of Reproduction and Genetics, Ningxia Medical University, Yinchuan, China

## Sheet: Supplementary Table 1
Supplementary Table 1 Patient characteristics and embryo development
Variable	Extended culture	Control	P
No. of oocyte retrieval cycles	234	315
Age (years)	30.49 ± 4.19	30.08 ± 4.08	0.248
Infertility duration (years)	3.77 ± 2.15	4.05 ± 2.40	0.154
Etiology of infertility (%)			0.204
Uterine and tubal factor	126 (53.85)	180 (57.14)
Endometriosis	17 (7.26)	16 (5.08)
PCO	31 (13.25)	34 (10.79)
Male factor	29 (12.39)	55 (17.46)
Other factors	31 (13.25)	30 (9.52)
Types of infertility (%)			0.185
Primary infertility	104 (44.44)	158 (50.16)
Secondary infertility	130 (55.56)	157 (49.84)
Body mass index (BMI) (kg/m2)	22.46 ± 2.86	22.66 ± 3.11	0.425
Basal hormone levels
FSH (mIU/mL)	6.80 ± 5.87	6.98 ± 2.25	0.662
LH (mIU/mL)	4.54 ± 4.64	4.99 ± 3.06	0.178
E2(pg/mL)	35.41 ± 19.13	37.16 ± 24.82	0.351
Stimulation protocol (%)			0.285
Long protocol	219 (93.59)	287 (91.11)
Short protocol	15 (6.41)	28 (8.89)
Ampoules of Gn used (75 IU/ampoules)	37.86 ± 8.41	38.24 ± 10.18	0.633
Days of stimulation (d)	11.19 ± 1.58	11.24 ± 1.76	0.753
Fertilization methods (%)			0.283
IVF	151 (64.53)	217 (68.89)
ICSI	83 (35.47)	98 (31.11)
No. of oocytes retrieved (n)	14.03 ± 6.61	13.73 ± 6.86	0.611
Fertilization rate (%)	83.30 ± 16.87	81.67 ± 16.13	0.252
No. of available embryos (n)	8.24 ± 4.80	7.88 ± 5.37	0.413
No. of high-quality embryos (n)	5.99 ± 3.78	5.68 ± 4.24	0.377

## Sheet: Supplementary Table 2
Supplementary Table 2 The perinatal and neonatal outcomes in fresh ET and FET
Variable	Extended culture	Control	P
No. of deliveries
Fresh ET cycles	73	87
FET cycles	92	124
Total	165	211
No. of newborn infants
Fresh ET cycles	99	114
FET cycles	121	154
Total	220	268
Mean gestational age, wk	38.12 ± 2.10	38.42 ± 2.19	0.192
Preterm birth (＜37 wk) (%)	34 (20.61)	37 (17.54)	0.45
Very Preterm birth (＜32 wk) (%)	2 (1.21)	4 (1.90)	0.699
No. of cesarean sections	124 (75.15)	148 (70.14)	0.281
No. of fetal deaths (% total	2 (0.91)	5 (1.87)	0.616
number of newborn infants)
No. of live newborn infants (n)	218	263
Male	107 (49.08)	133 (50.57)	0.745
Female	111 (50.92)	130(49.43)
No. of singleton newborn infants	111 (67.27)	154 (72.99)	0.228
Mean birth weight (g)	3186.76 ± 870.95	3256.98 ± 781.62	0.355
Low Birth Weight(＜2500g)）	48 (21.92)	53 (19.78)	0.562
Very Low Birth Weight(＜1500g)	6 (2.82)	1 (0.38)	0.788
